# Supplementary material for: Bioactive fragments synergically involved in the design of new generation Pt(ii) and Pd(ii)-based anticancer compounds
Source: Royal Society of Chemistry journal article supplement (doi:10.1039/b808093c), 2008-01-01
Supplement: b808093c.pdf [file b808093c.pdf]

Electronic Supplementary Information for Dalton Transactions  
This journal is © The Royal Society of Chemistry 2008

**Table ESI.** Cartesian coordinates for optimized structures using DFT in neutral and acid conditions

**Neutral conditions**

-----  
Step1

Reactants

|    |           |           |           |
|----|-----------|-----------|-----------|
| C  | -0.241177 | 2.751603  | 0.022287  |
| N  | 0.060232  | 1.454625  | 0.222638  |
| C  | 1.359687  | 1.041754  | 0.225284  |
| C  | 2.393543  | 1.954158  | 0.030632  |
| C  | 2.088293  | 3.300421  | -0.176441 |
| C  | 0.749152  | 3.701815  | -0.181688 |
| Pt | -1.313045 | 0.021233  | 0.510584  |
| N  | 0.360236  | -1.080694 | 0.608656  |
| C  | 0.369858  | -2.412342 | 0.807970  |
| C  | 1.557284  | -3.128563 | 0.856091  |
| C  | 2.768416  | -2.449033 | 0.695655  |
| C  | 2.751101  | -1.068689 | 0.488730  |
| C  | 1.530313  | -0.400272 | 0.444398  |
| C  | 4.041513  | -3.247072 | 0.753156  |
| O  | 5.124868  | -2.475665 | 0.593961  |
| C  | 6.394460  | -3.168019 | 0.636656  |
| C  | 3.143055  | 4.349076  | -0.397303 |
| O  | 4.378795  | 3.833894  | -0.357792 |
| C  | 5.454858  | 4.779392  | -0.560789 |
| O  | -2.683057 | -1.417525 | 0.812318  |
| C  | -3.923164 | -0.978591 | 0.836402  |
| C  | -4.092049 | 0.450076  | 0.619232  |
| C  | -5.302854 | 1.159640  | 0.596576  |
| C  | -6.609251 | 0.708693  | 0.770538  |
| C  | -7.077351 | -0.583481 | 1.015295  |
| C  | -6.318801 | -1.748310 | 1.143755  |
| C  | -4.938768 | -1.920146 | 1.064501  |
| O  | -2.984627 | 1.133243  | 0.424447  |
| O  | 4.055478  | -4.446019 | 0.925129  |
| O  | 2.877075  | 5.515713  | -0.585649 |
| H  | -0.601664 | -2.878433 | 0.925675  |
| H  | 1.555562  | -4.200636 | 1.016129  |
| H  | 3.682387  | -0.532355 | 0.360196  |
| H  | 3.426567  | 1.631161  | 0.033842  |
| H  | 0.497355  | 4.743755  | -0.342693 |
| H  | -1.296946 | 2.997004  | 0.031165  |
| H  | -4.562592 | -2.931425 | 1.198780  |
| H  | -6.881761 | -2.658946 | 1.334415  |
| H  | -8.153150 | -0.695161 | 1.117299  |
| H  | -7.371251 | 1.481777  | 0.705490  |
| H  | -5.172030 | 2.223755  | 0.415557  |
| H  | 6.441844  | -3.910893 | -0.162469 |
| H  | 6.517765  | -3.663038 | 1.602267  |
| H  | 5.425737  | 5.550139  | 0.212353  |
| H  | 5.361900  | 5.245656  | -1.543980 |
| H  | 6.369994  | 4.193064  | -0.492492 |

# Electronic Supplementary Information for Dalton Transactions

This journal is © The Royal Society of Chemistry 2008

|   |           |           |           |
|---|-----------|-----------|-----------|
| H | 7.148690  | -2.395257 | 0.495584  |
| O | 0.330522  | -0.268518 | -2.490461 |
| H | 0.356238  | -0.369775 | -3.454569 |
| H | -0.607408 | -0.347122 | -2.254515 |

## Transition state

|    |           |           |           |
|----|-----------|-----------|-----------|
| C  | 0.697295  | 1.216160  | 1.959894  |
| N  | 0.589033  | 0.405713  | 0.885972  |
| C  | 1.032274  | -0.886421 | 0.951073  |
| C  | 1.593511  | -1.384349 | 2.125271  |
| C  | 1.705602  | -0.553322 | 3.240532  |
| C  | 1.250723  | 0.766205  | 3.149012  |
| Pt | -0.166948 | 0.986298  | -0.853932 |
| N  | 0.304260  | -0.914439 | -1.311594 |
| C  | 0.045436  | -1.516696 | -2.490686 |
| C  | 0.346094  | -2.850173 | -2.718859 |
| C  | 0.930018  | -3.600642 | -1.693108 |
| C  | 1.179741  | -2.985723 | -0.466578 |
| C  | 0.855276  | -1.640706 | -0.292046 |
| C  | 1.248731  | -5.044937 | -1.964633 |
| O  | 1.791172  | -5.646973 | -0.899564 |
| C  | 2.126433  | -7.044434 | -1.075568 |
| C  | 2.299428  | -1.012600 | 4.542426  |
| O  | 2.696434  | -2.290864 | 4.489051  |
| C  | 3.282308  | -2.812661 | 5.705217  |
| O  | -2.356852 | 1.605383  | -1.798633 |
| C  | -2.749116 | 2.699125  | -1.243881 |
| C  | -1.780956 | 3.403523  | -0.391701 |
| C  | -1.953998 | 4.655443  | 0.213688  |
| C  | -3.052021 | 5.520081  | 0.240782  |
| C  | -4.311070 | 5.366799  | -0.325988 |
| C  | -4.757225 | 4.281239  | -1.089919 |
| C  | -4.079373 | 3.136089  | -1.480764 |
| O  | -0.611662 | 2.828478  | -0.179943 |
| O  | 1.027628  | -5.571295 | -3.032871 |
| O  | 2.394578  | -0.289166 | 5.509160  |
| H  | -0.424425 | -0.899858 | -3.246461 |
| H  | 0.131703  | -3.315150 | -3.674414 |
| H  | 1.616754  | -3.557821 | 0.341920  |
| H  | 1.945843  | -2.406517 | 2.179191  |
| H  | 1.334320  | 1.426440  | 4.004848  |
| H  | 0.329443  | 2.225240  | 1.818592  |
| H  | -4.634811 | 2.430919  | -2.094637 |
| H  | -5.785435 | 4.344675  | -1.439687 |
| H  | -5.023031 | 6.170535  | -0.160759 |
| H  | -2.889961 | 6.440348  | 0.797470  |
| H  | -1.068772 | 4.992507  | 0.748132  |
| H  | 2.860118  | -7.153634 | -1.877011 |
| H  | 1.228529  | -7.615035 | -1.321813 |
| H  | 2.558176  | -2.759746 | 6.520941  |
| H  | 4.171356  | -2.235770 | 5.968592  |
| H  | 3.540865  | -3.846201 | 5.479791  |
| H  | 2.541623  | -7.362916 | -0.120643 |
| O  | -0.154705 | 1.848044  | -2.984582 |
| H  | 0.269749  | 1.400372  | -3.734714 |
| H  | -1.134124 | 1.846226  | -3.102830 |

## Products

|   |           |          |           |
|---|-----------|----------|-----------|
| C | -0.494844 | 2.177683 | -0.222690 |
| N | 0.079109  | 0.962482 | -0.160936 |
| C | 1.431502  | 0.854378 | -0.012954 |
| C | 2.230990  | 1.990841 | 0.091648  |

# Electronic Supplementary Information for Dalton Transactions

This journal is © The Royal Society of Chemistry 2008

|    |           |           |           |
|----|-----------|-----------|-----------|
| C  | 1.637522  | 3.253595  | 0.034561  |
| C  | 0.253230  | 3.344032  | -0.130343 |
| Pt | -0.913298 | -0.806248 | -0.173158 |
| N  | 0.961040  | -1.485711 | -0.109551 |
| C  | 1.306732  | -2.785930 | -0.208308 |
| C  | 2.631597  | -3.194646 | -0.163012 |
| C  | 3.636351  | -2.234226 | -0.021158 |
| C  | 3.277863  | -0.886910 | 0.047644  |
| C  | 1.932407  | -0.528633 | -0.007113 |
| C  | 5.064835  | -2.702468 | 0.031891  |
| O  | 5.921609  | -1.682140 | 0.161929  |
| C  | 7.321428  | -2.047079 | 0.220168  |
| C  | 2.425798  | 4.530092  | 0.140883  |
| O  | 3.734831  | 4.298564  | 0.300432  |
| C  | 4.568200  | 5.476708  | 0.412256  |
| O  | -3.953322 | -1.957773 | 0.988383  |
| C  | -4.641053 | -0.911508 | 0.589807  |
| C  | -3.993807 | 0.118105  | -0.220099 |
| C  | -4.697078 | 1.182416  | -0.841878 |
| C  | -6.013836 | 1.615939  | -0.760989 |
| C  | -7.068838 | 1.117415  | 0.006615  |
| C  | -7.019057 | 0.005940  | 0.840006  |
| C  | -5.961793 | -0.874428 | 1.066546  |
| O  | -2.713418 | 0.123195  | -0.443385 |
| O  | 5.370654  | -3.872117 | -0.037110 |
| O  | 1.908570  | 5.623832  | 0.085185  |
| H  | 0.488846  | -3.482520 | -0.343835 |
| H  | 2.892123  | -4.244149 | -0.240396 |
| H  | 4.048275  | -0.131423 | 0.132704  |
| H  | 3.303087  | 1.907831  | 0.215380  |
| H  | -0.221966 | 4.317088  | -0.181500 |
| H  | -1.570551 | 2.174951  | -0.346274 |
| H  | -6.175598 | -1.716213 | 1.720506  |
| H  | -7.937105 | -0.239233 | 1.368496  |
| H  | -8.016100 | 1.644964  | -0.058598 |
| H  | -6.242612 | 2.485815  | -1.372564 |
| H  | -4.049289 | 1.767797  | -1.489882 |
| H  | 7.610814  | -2.562145 | -0.698243 |
| H  | 7.501101  | -2.699693 | 1.077056  |
| H  | 4.262252  | 6.069529  | 1.276844  |
| H  | 4.483255  | 6.081046  | -0.493341 |
| H  | 5.582606  | 5.100788  | 0.536549  |
| H  | 7.859718  | -1.106493 | 0.326221  |
| O  | -1.806498 | -2.600995 | -0.115475 |
| H  | -1.445607 | -3.109267 | 0.631445  |
| H  | -3.085320 | -2.177108 | 0.458593  |

Step2 – Same side

## Reactants

|    |           |           |           |
|----|-----------|-----------|-----------|
| C  | 0.616089  | 2.024387  | 0.382566  |
| N  | -0.035815 | 0.853521  | 0.266409  |
| C  | -1.377859 | 0.847948  | 0.011935  |
| C  | -2.079869 | 2.037644  | -0.162469 |
| C  | -1.400559 | 3.254246  | -0.062359 |
| C  | -0.034886 | 3.242039  | 0.223822  |
| Pt | 0.816064  | -0.988096 | 0.347266  |
| N  | -1.104558 | -1.517071 | 0.179462  |
| C  | -1.558525 | -2.783659 | 0.272894  |
| C  | -2.903149 | -3.091172 | 0.127559  |
| C  | -3.813768 | -2.059025 | -0.113751 |
| C  | -3.345933 | -0.745856 | -0.176080 |

Electronic Supplementary Information for Dalton Transactions

This journal is © The Royal Society of Chemistry 2008

|   |           |           |           |
|---|-----------|-----------|-----------|
| C | -1.984580 | -0.491122 | -0.017446 |
| C | -5.265887 | -2.416829 | -0.277755 |
| O | -6.026578 | -1.336385 | -0.491092 |
| C | -7.441498 | -1.592536 | -0.659669 |
| C | -2.080024 | 4.583240  | -0.243832 |
| O | -3.387485 | 4.446284  | -0.502141 |
| C | -4.117671 | 5.680900  | -0.692512 |
| O | 3.592657  | -2.233705 | -1.086010 |
| C | 4.277815  | -1.125442 | -0.930298 |
| C | 3.844499  | -0.142505 | 0.055631  |
| C | 4.604704  | 0.983287  | 0.445180  |
| C | 5.797882  | 1.515437  | -0.038023 |
| C | 6.595968  | 1.088888  | -1.098275 |
| C | 6.384842  | -0.040608 | -1.886934 |
| C | 5.384208  | -1.002879 | -1.791141 |
| O | 2.726288  | -0.318629 | 0.714882  |
| O | -5.666819 | -3.557975 | -0.218718 |
| O | -1.489537 | 5.637469  | -0.162443 |
| H | -0.813575 | -3.540252 | 0.485506  |
| H | -3.251260 | -4.115138 | 0.201865  |
| H | -4.044732 | 0.064673  | -0.337688 |
| H | -3.141573 | 2.032377  | -0.372589 |
| H | 0.506351  | 4.175935  | 0.322543  |
| H | 1.665671  | 1.962206  | 0.629371  |
| H | 5.457615  | -1.840787 | -2.479893 |
| H | 7.117990  | -0.220792 | -2.669437 |
| H | 7.472644  | 1.689027  | -1.325016 |
| H | 6.135214  | 2.410398  | 0.479865  |
| H | 4.151373  | 1.519563  | 1.276635  |
| H | -7.843390 | -2.069429 | 0.236727  |
| H | -7.602435 | -2.242279 | -1.522476 |
| H | -3.701862 | 6.234222  | -1.537243 |
| H | -4.057429 | 6.293423  | 0.209615  |
| H | -5.145226 | 5.380100  | -0.891410 |
| H | -7.893871 | -0.614744 | -0.817762 |
| O | 1.621200  | -2.825694 | 0.348911  |
| H | 1.178365  | -3.388814 | -0.308192 |
| H | 2.843186  | -2.437684 | -0.391364 |
| H | 2.509916  | 0.583701  | 2.463241  |
| O | 2.347976  | 1.436134  | 2.905424  |
| H | 2.434228  | 1.262376  | 3.855107  |

Transition state

|    |           |           |           |
|----|-----------|-----------|-----------|
| C  | -0.258105 | 2.300284  | -0.797628 |
| N  | 0.181821  | 1.037634  | -0.633449 |
| C  | 1.458785  | 0.807364  | -0.213626 |
| C  | 2.325355  | 1.867426  | 0.049381  |
| C  | 1.873225  | 3.177181  | -0.117671 |
| C  | 0.559733  | 3.392557  | -0.547056 |
| Pt | -0.917029 | -0.592508 | -1.039178 |
| N  | 0.770185  | -1.466427 | -0.417265 |
| C  | 0.959285  | -2.799064 | -0.300385 |
| C  | 2.156709  | -3.339219 | 0.139168  |
| C  | 3.209102  | -2.483405 | 0.478948  |
| C  | 3.013550  | -1.107231 | 0.369889  |
| C  | 1.788473  | -0.614421 | -0.076720 |
| C  | 4.498470  | -3.092772 | 0.951597  |
| O  | 5.415817  | -2.161546 | 1.242647  |
| C  | 6.691170  | -2.665857 | 1.705267  |
| C  | 2.739067  | 4.377969  | 0.144244  |
| O  | 3.975131  | 4.031638  | 0.526250  |
| C  | 4.876362  | 5.131967  | 0.793327  |

# Electronic Supplementary Information for Dalton Transactions

This journal is © The Royal Society of Chemistry 2008

|   |           |           |           |
|---|-----------|-----------|-----------|
| O | -3.709493 | -2.049994 | 0.476190  |
| C | -4.168727 | -0.947764 | 1.040268  |
| C | -3.789454 | 0.347710  | 0.468276  |
| C | -4.254957 | 1.594980  | 0.965371  |
| C | -5.088198 | 1.929256  | 2.023185  |
| C | -5.729033 | 1.099845  | 2.950227  |
| C | -5.671940 | -0.287395 | 2.992403  |
| C | -4.992231 | -1.170511 | 2.150106  |
| O | -3.024551 | 0.361542  | -0.567847 |
| O | 4.658754  | -4.289599 | 1.047662  |
| O | 2.337980  | 5.513792  | 0.016508  |
| H | 0.119826  | -3.428816 | -0.562211 |
| H | 2.282946  | -4.412808 | 0.222284  |
| H | 3.814033  | -0.428563 | 0.635530  |
| H | 3.340934  | 1.687506  | 0.378086  |
| H | 0.195861  | 4.404550  | -0.683303 |
| H | -1.282543 | 2.399435  | -1.134254 |
| H | -5.116108 | -2.228374 | 2.368044  |
| H | -6.243240 | -0.764890 | 3.784935  |
| H | -6.335042 | 1.590199  | 3.706781  |
| H | -5.262250 | 2.995968  | 2.147100  |
| H | -3.875541 | 2.428641  | 0.379099  |
| H | 7.141837  | -3.299941 | 0.938878  |
| H | 6.553842  | -3.243105 | 2.622065  |
| H | 4.483411  | 5.748104  | 1.604905  |
| H | 4.995208  | 5.743060  | -0.103845 |
| H | 5.820059  | 4.668720  | 1.077402  |
| H | 7.300733  | -1.782259 | 1.888302  |
| O | -2.088052 | -2.129203 | -1.535921 |
| H | -1.671068 | -3.002866 | -1.565433 |
| H | -3.132058 | -1.945533 | -0.353953 |
| H | -2.905823 | 0.512501  | -2.438816 |
| O | -2.099698 | 0.344824  | -2.968767 |
| H | -2.267725 | -0.509397 | -3.405922 |

## Product

|    |           |           |           |
|----|-----------|-----------|-----------|
| C  | -0.931179 | -2.731633 | -0.444871 |
| N  | -0.942234 | -1.386174 | -0.450452 |
| C  | -2.070232 | -0.711404 | -0.082849 |
| C  | -3.220982 | -1.399731 | 0.295254  |
| C  | -3.213987 | -2.796635 | 0.298063  |
| C  | -2.049099 | -3.469997 | -0.077343 |
| Pt | 0.613464  | -0.191427 | -0.987092 |
| N  | -0.722532 | 1.211519  | -0.529848 |
| C  | -0.465079 | 2.531590  | -0.591355 |
| C  | -1.434520 | 3.468321  | -0.254970 |
| C  | -2.694925 | 3.028329  | 0.155442  |
| C  | -2.948337 | 1.655773  | 0.224551  |
| C  | -1.943652 | 0.756129  | -0.122197 |
| C  | -3.727963 | 4.062899  | 0.511191  |
| O  | -4.884285 | 3.505342  | 0.892985  |
| C  | -5.934552 | 4.433602  | 1.253486  |
| C  | -4.412549 | -3.616109 | 0.691512  |
| O  | -5.457036 | -2.847465 | 1.024755  |
| C  | -6.655391 | -3.558335 | 1.416403  |
| O  | 4.292708  | 1.645424  | 0.011013  |
| C  | 5.207222  | 0.859439  | 0.562671  |
| C  | 4.912325  | -0.581675 | 0.539147  |
| C  | 5.786544  | -1.585030 | 1.045668  |
| C  | 7.019892  | -1.489019 | 1.665088  |
| C  | 7.783535  | -0.353039 | 1.981634  |
| C  | 7.457056  | 0.968725  | 1.723333  |

# Electronic Supplementary Information for Dalton Transactions

This journal is © The Royal Society of Chemistry 2008

|   |           |           |           |
|---|-----------|-----------|-----------|
| C | 6.321703  | 1.498920  | 1.093876  |
| O | 3.792416  | -0.884322 | 0.026453  |
| O | -3.510235 | 5.252410  | 0.449527  |
| O | -4.403324 | -4.827140 | 0.696111  |
| H | 0.539443  | 2.784773  | -0.913429 |
| H | -1.222127 | 4.530122  | -0.306816 |
| H | -3.920075 | 1.305904  | 0.548343  |
| H | -4.117701 | -0.867762 | 0.586065  |
| H | -2.027066 | -4.553850 | -0.076907 |
| H | 0.002641  | -3.195167 | -0.741092 |
| H | 6.288938  | 2.580519  | 0.988634  |
| H | 8.183906  | 1.710453  | 2.046333  |
| H | 8.731173  | -0.533433 | 2.481357  |
| H | 7.461284  | -2.440811 | 1.953642  |
| H | 5.384691  | -2.587318 | 0.916115  |
| H | -6.178447 | 5.070680  | 0.400710  |
| H | -5.612157 | 5.054368  | 2.092110  |
| H | -6.451509 | -4.180805 | 2.290192  |
| H | -7.002109 | -4.186831 | 0.593379  |
| H | -7.385248 | -2.784795 | 1.650427  |
| H | -6.784515 | 3.812494  | 1.532082  |
| O | 2.035993  | 1.143646  | -1.405585 |
| H | 2.227376  | 1.142516  | -2.358593 |
| H | 3.531304  | 1.137907  | -0.394411 |
| H | 2.770704  | -1.549654 | -0.824916 |
| O | 1.938934  | -1.761246 | -1.393633 |
| H | 2.226338  | -1.735336 | -2.323327 |

Step2 – Opposite side

## Reactants

|    |           |           |           |
|----|-----------|-----------|-----------|
| C  | 0.556636  | 2.147411  | -0.497308 |
| N  | -0.048386 | 0.952860  | -0.360738 |
| C  | -1.396282 | 0.885552  | -0.149834 |
| C  | -2.159859 | 2.047967  | -0.070707 |
| C  | -1.536235 | 3.290004  | -0.209361 |
| C  | -0.157039 | 3.336468  | -0.425675 |
| Pt | 0.888909  | -0.819917 | -0.466364 |
| N  | -0.989339 | -1.463308 | -0.172378 |
| C  | -1.339262 | -2.759411 | -0.069683 |
| C  | -2.653193 | -3.136328 | 0.179563  |
| C  | -3.628605 | -2.148053 | 0.331303  |
| C  | -3.257303 | -0.804983 | 0.227616  |
| C  | -1.926704 | -0.482036 | -0.025918 |
| C  | -5.043045 | -2.581592 | 0.606922  |
| O  | -5.868107 | -1.536472 | 0.746576  |
| C  | -7.251507 | -1.866153 | 1.018323  |
| C  | -2.287968 | 4.591894  | -0.140007 |
| O  | -3.596623 | 4.403527  | 0.066432  |
| C  | -4.396690 | 5.607991  | 0.143777  |
| O  | 3.223633  | -1.794456 | 1.254067  |
| C  | 3.920059  | -0.740531 | 1.169335  |
| C  | 3.718894  | 0.187337  | 0.033142  |
| C  | 4.509304  | 1.292363  | -0.276465 |
| C  | 5.616551  | 1.877503  | 0.367960  |
| C  | 6.212240  | 1.530010  | 1.562397  |
| C  | 5.842588  | 0.457424  | 2.399352  |
| C  | 4.866363  | -0.498268 | 2.224028  |
| O  | 2.748992  | -0.071371 | -0.850118 |
| O  | -5.364596 | -3.746020 | 0.687932  |
| O  | -1.742807 | 5.666365  | -0.261754 |
| H  | -0.533007 | -3.474090 | -0.188319 |

# Electronic Supplementary Information for Dalton Transactions

This journal is © The Royal Society of Chemistry 2008

|   |           |           |           |
|---|-----------|-----------|-----------|
| H | -2.925589 | -4.182610 | 0.259814  |
| H | -4.004528 | -0.031321 | 0.349400  |
| H | -3.228624 | 1.999880  | 0.093938  |
| H | 0.340783  | 4.293042  | -0.536857 |
| H | 1.625296  | 2.113343  | -0.668803 |
| H | 4.791913  | -1.261757 | 2.994549  |
| H | 6.427514  | 0.353577  | 3.310804  |
| H | 7.048485  | 2.139225  | 1.893964  |
| H | 6.038101  | 2.736778  | -0.148673 |
| H | 4.206943  | 1.776413  | -1.203532 |
| H | -7.323659 | -2.432547 | 1.949152  |
| H | -7.661776 | -2.458362 | 0.197681  |
| H | -4.319693 | 6.166810  | -0.791220 |
| H | -4.052674 | 6.231428  | 0.971686  |
| H | -5.416635 | 5.265321  | 0.310871  |
| H | -7.763966 | -0.909114 | 1.103160  |
| O | 1.733270  | -2.699270 | -0.555132 |
| H | 2.239449  | -2.720631 | -1.422808 |
| H | 2.440614  | -2.514167 | 0.174416  |
| H | 3.242669  | -1.240904 | -2.399274 |
| O | 3.195946  | -2.170070 | -2.702940 |
| H | 2.866195  | -2.148933 | -3.614833 |

## Transition state

|    |           |           |           |
|----|-----------|-----------|-----------|
| C  | 0.036359  | 2.382684  | -0.550265 |
| N  | -0.347706 | 1.094439  | -0.482729 |
| C  | -1.643996 | 0.782893  | -0.189080 |
| C  | -2.594296 | 1.786885  | -0.009062 |
| C  | -2.205552 | 3.123646  | -0.111792 |
| C  | -0.865465 | 3.423125  | -0.374154 |
| Pt | 0.864746  | -0.498377 | -0.766281 |
| N  | -0.788251 | -1.440255 | -0.218537 |
| C  | -0.863863 | -2.776185 | -0.041057 |
| C  | -2.061093 | -3.390817 | 0.295154  |
| C  | -3.212214 | -2.613301 | 0.455341  |
| C  | -3.121142 | -1.229998 | 0.289634  |
| C  | -1.895748 | -0.656367 | -0.041348 |
| C  | -4.496629 | -3.308816 | 0.807632  |
| O  | -5.517505 | -2.448691 | 0.924149  |
| C  | -6.794702 | -3.040399 | 1.259052  |
| C  | -3.165828 | 4.267530  | 0.065740  |
| O  | -4.411895 | 3.842943  | 0.309752  |
| C  | -5.401238 | 4.883471  | 0.492324  |
| O  | 4.282155  | -1.087277 | -0.993286 |
| C  | 4.739460  | -0.457098 | 0.110655  |
| C  | 3.838230  | 0.535158  | 0.710304  |
| C  | 4.168853  | 1.286616  | 1.890303  |
| C  | 5.308428  | 1.332141  | 2.661245  |
| C  | 6.529907  | 0.638525  | 2.512170  |
| C  | 6.844151  | -0.278521 | 1.532759  |
| C  | 6.037712  | -0.761025 | 0.479857  |
| O  | 2.720436  | 0.771963  | 0.151855  |
| O  | -4.571313 | -4.508001 | 0.960896  |
| O  | -2.822173 | 5.426657  | -0.008863 |
| H  | 0.067754  | -3.312722 | -0.177583 |
| H  | -2.111553 | -4.465115 | 0.432210  |
| H  | -4.001452 | -0.614065 | 0.422822  |
| H  | -3.624585 | 1.542518  | 0.215802  |
| H  | -0.545137 | 4.456985  | -0.434951 |
| H  | 1.093104  | 2.548794  | -0.722070 |
| H  | 6.497190  | -1.505039 | -0.166134 |
| H  | 7.842038  | -0.708036 | 1.575176  |

# Electronic Supplementary Information for Dalton Transactions

This journal is © The Royal Society of Chemistry 2008

|   |           |           |           |
|---|-----------|-----------|-----------|
| H | 7.299325  | 0.857361  | 3.247470  |
| H | 5.263863  | 2.015494  | 3.506785  |
| H | 3.354174  | 1.941507  | 2.190246  |
| H | -6.728708 | -3.551467 | 2.221933  |
| H | -7.089554 | -3.754336 | 0.487050  |
| H | -5.465628 | 5.498996  | -0.407391 |
| H | -5.130652 | 5.510183  | 1.344740  |
| H | -6.338706 | 4.360341  | 0.674768  |
| H | -7.494422 | -2.207309 | 1.307083  |
| O | 1.976579  | -2.168065 | -0.921918 |
| H | 1.902799  | -2.487844 | -1.839222 |
| H | 3.369014  | -1.562902 | -0.859443 |
| H | 3.192591  | -0.011726 | -2.135130 |
| O | 2.312964  | 0.174963  | -2.540153 |
| H | 2.308105  | 1.125698  | -2.737264 |

## Products

|    |           |           |           |
|----|-----------|-----------|-----------|
| C  | 0.700540  | -2.629764 | -0.358215 |
| N  | 0.835396  | -1.291238 | -0.335979 |
| C  | 2.056435  | -0.728634 | -0.101516 |
| C  | 3.179408  | -1.526523 | 0.104689  |
| C  | 3.045771  | -2.917011 | 0.075836  |
| C  | 1.785718  | -3.473597 | -0.155472 |
| Pt | -0.660158 | 0.033133  | -0.665474 |
| N  | 0.831126  | 1.312623  | -0.304000 |
| C  | 0.679236  | 2.649529  | -0.251932 |
| C  | 1.754319  | 3.489630  | 0.007540  |
| C  | 3.016305  | 2.932062  | 0.226309  |
| C  | 3.161776  | 1.543031  | 0.191145  |
| C  | 2.051344  | 0.744601  | -0.072350 |
| C  | 4.166057  | 3.862802  | 0.501400  |
| O  | 5.312705  | 3.198678  | 0.693780  |
| C  | 6.472198  | 4.021681  | 0.964597  |
| C  | 4.206785  | -3.849917 | 0.286881  |
| O  | 5.351224  | -3.186067 | 0.494447  |
| C  | 6.521149  | -4.011376 | 0.705987  |
| O  | -4.507013 | 0.538984  | -1.237205 |
| C  | -5.379670 | 0.252171  | -0.262060 |
| C  | -4.846710 | -0.410881 | 0.931267  |
| C  | -5.609601 | -0.632187 | 2.119477  |
| C  | -6.953377 | -0.468622 | 2.386862  |
| C  | -7.991718 | -0.029340 | 1.542773  |
| C  | -7.868855 | 0.402053  | 0.235689  |
| C  | -6.706441 | 0.547721  | -0.542078 |
| O  | -3.628142 | -0.789797 | 0.931059  |
| O  | 4.038110  | 5.066414  | 0.537314  |
| O  | 4.089534  | -5.055023 | 0.265410  |
| H  | -0.331440 | 3.006395  | -0.414913 |
| H  | 1.624021  | 4.565234  | 0.044040  |
| H  | 4.132763  | 1.101009  | 0.373802  |
| H  | 4.150765  | -1.085290 | 0.287649  |
| H  | 1.665637  | -4.550828 | -0.175592 |
| H  | -0.302455 | -2.997056 | -0.542980 |
| H  | -6.844831 | 0.977481  | -1.531265 |
| H  | -8.787988 | 0.708074  | -0.258110 |
| H  | -8.991143 | -0.026956 | 1.968938  |
| H  | -7.258000 | -0.748969 | 3.392925  |
| H  | -4.998479 | -1.042033 | 2.919893  |
| H  | 6.312417  | 4.603170  | 1.875049  |
| H  | 6.653553  | 4.698045  | 0.126649  |
| H  | 6.694117  | -4.644375 | -0.166897 |
| H  | 6.380909  | -4.638164 | 1.589209  |



|   |           |           |           |
|---|-----------|-----------|-----------|
| H | 7.343921  | -3.312775 | 0.850353  |
| H | 7.298393  | 3.323131  | 1.087961  |
| O | -2.078051 | 1.426717  | -0.945113 |
| H | -2.005700 | 1.758426  | -1.857490 |
| H | -3.585380 | 0.824772  | -0.917845 |
| H | -2.585115 | -1.248571 | -1.787303 |
| O | -2.141796 | -1.385104 | -0.930412 |
| H | -2.875894 | -1.127820 | -0.172509 |

---

#### Acid conditions

---

#### Step1

##### Reactants

|    |           |           |           |
|----|-----------|-----------|-----------|
| C  | -0.073416 | 2.669375  | -0.073485 |
| N  | -0.239847 | 1.333673  | -0.086627 |
| C  | -1.494417 | 0.796052  | -0.103153 |
| C  | -2.620254 | 1.616263  | -0.108800 |
| C  | -2.454848 | 3.003600  | -0.094082 |
| C  | -1.161597 | 3.533325  | -0.075452 |
| Pt | 1.276764  | 0.014016  | -0.086221 |
| N  | -0.256640 | -1.241367 | -0.130321 |
| C  | -0.118450 | -2.586773 | -0.152125 |
| C  | -1.211162 | -3.432944 | -0.165206 |
| C  | -2.502842 | -2.865650 | -0.160235 |
| C  | -2.642308 | -1.467238 | -0.141685 |
| C  | -1.504315 | -0.671132 | -0.123400 |
| C  | -3.673734 | -3.718428 | -0.173593 |
| O  | -4.843759 | -3.174233 | -0.177846 |
| C  | -6.081725 | -3.963159 | -0.190059 |
| C  | -3.613717 | 3.967756  | -0.099204 |
| O  | -4.790855 | 3.334517  | -0.132773 |
| C  | -5.960512 | 4.196034  | -0.145964 |
| O  | 2.787753  | -1.300157 | -0.085736 |
| C  | 3.983628  | -0.737105 | -0.079359 |
| C  | 3.992272  | 0.709480  | -0.055823 |
| C  | 5.110415  | 1.553764  | -0.043975 |
| C  | 6.467240  | 1.233168  | -0.052976 |
| C  | 7.077979  | -0.021970 | -0.074691 |
| C  | 6.456271  | -1.274349 | -0.093073 |
| C  | 5.099727  | -1.587824 | -0.094598 |
| O  | 2.798525  | 1.284782  | -0.044381 |
| O  | -3.480216 | -5.006699 | -0.182062 |
| O  | -3.452972 | 5.166201  | -0.075681 |
| H  | 0.901572  | -2.954427 | -0.158329 |
| H  | -1.060338 | -4.505566 | -0.180664 |
| H  | -3.625136 | -1.013346 | -0.135519 |
| H  | -3.620240 | 1.201008  | -0.125887 |
| H  | -1.019693 | 4.608525  | -0.065556 |
| H  | 0.952758  | 3.018801  | -0.062801 |
| H  | 4.840343  | -2.643555 | -0.111746 |
| H  | 7.124769  | -2.131503 | -0.109099 |
| H  | 8.164358  | -0.026864 | -0.078270 |
| H  | 7.140246  | 2.086771  | -0.041735 |
| H  | 4.855762  | 2.610614  | -0.026975 |
| H  | -6.134276 | -4.574198 | 0.715123  |
| H  | -6.126825 | -4.556808 | -1.107135 |
| H  | -5.937719 | 4.837177  | -1.029179 |

# Electronic Supplementary Information for Dalton Transactions

This journal is © The Royal Society of Chemistry 2008

|   |           |           |           |
|---|-----------|-----------|-----------|
| H | -5.976955 | 4.812075  | 0.755094  |
| H | -6.813922 | 3.520760  | -0.174473 |
| H | -6.876616 | -3.220862 | -0.186311 |
| O | -0.970863 | -0.572024 | 2.891468  |
| H | -1.210818 | 0.165448  | 3.475117  |
| H | -0.225222 | -0.992652 | 3.348416  |
| H | -4.290565 | -5.553382 | -0.194467 |

## Transition state

|    |           |           |           |
|----|-----------|-----------|-----------|
| C  | -0.373604 | 2.396627  | -0.434163 |
| N  | 0.078424  | 1.129032  | -0.347445 |
| C  | 1.403778  | 0.883609  | -0.109055 |
| C  | 2.300275  | 1.937128  | 0.061674  |
| C  | 1.838997  | 3.251799  | -0.021461 |
| C  | 0.483230  | 3.477522  | -0.279476 |
| Pt | -1.087213 | -0.478887 | -0.506887 |
| N  | 0.667941  | -1.377517 | -0.290302 |
| C  | 0.846928  | -2.721363 | -0.291784 |
| C  | 2.085129  | -3.296476 | -0.081560 |
| C  | 3.195813  | -2.454831 | 0.143938  |
| C  | 3.010334  | -1.061144 | 0.144600  |
| C  | 1.740680  | -0.540771 | -0.075212 |
| C  | 4.508690  | -3.022167 | 0.369108  |
| O  | 5.507265  | -2.228545 | 0.569835  |
| C  | 6.870335  | -2.720085 | 0.806652  |
| C  | 2.736932  | 4.449941  | 0.150634  |
| O  | 4.003369  | 4.094640  | 0.388476  |
| C  | 4.935842  | 5.194751  | 0.567109  |
| O  | -2.815518 | -1.556684 | 0.753406  |
| C  | -3.863217 | -0.799484 | 0.802963  |
| C  | -3.868879 | 0.359558  | -0.084759 |
| C  | -4.930641 | 1.237744  | -0.327911 |
| C  | -6.204826 | 1.299091  | 0.244931  |
| C  | -6.759677 | 0.505740  | 1.243320  |
| C  | -6.156010 | -0.576647 | 1.899080  |
| C  | -4.900553 | -1.136044 | 1.709057  |
| O  | -2.748955 | 0.606179  | -0.753986 |
| O  | 4.612216  | -4.321160 | 0.356254  |
| O  | 2.318048  | 5.581923  | 0.074736  |
| H  | -0.038099 | -3.314394 | -0.484661 |
| H  | 2.182311  | -4.375342 | -0.094383 |
| H  | 3.847801  | -0.396169 | 0.314858  |
| H  | 3.349842  | 1.753598  | 0.255837  |
| H  | 0.111788  | 4.493744  | -0.355152 |
| H  | -1.433130 | 2.503640  | -0.632634 |
| H  | -4.650918 | -1.995615 | 2.326290  |
| H  | -6.761422 | -1.058634 | 2.663091  |
| H  | -7.771737 | 0.752035  | 1.551761  |
| H  | -6.840493 | 2.092039  | -0.141239 |
| H  | -4.708319 | 1.984776  | -1.086386 |
| H  | 7.215991  | -3.274537 | -0.070053 |
| H  | 6.889038  | -3.317643 | 1.722119  |
| H  | 4.629430  | 5.804629  | 1.419018  |
| H  | 4.960653  | 5.808686  | -0.335143 |
| H  | 5.901366  | 4.725717  | 0.748365  |
| H  | 7.465119  | -1.818911 | 0.936771  |
| O  | -1.954818 | -2.405321 | -1.482927 |
| H  | -2.405607 | -2.233070 | -2.329003 |
| H  | -2.647107 | -2.524438 | -0.789965 |
| H  | 5.511348  | -4.672810 | 0.509479  |

## Products

Electronic Supplementary Information for Dalton Transactions

This journal is © The Royal Society of Chemistry 2008

|    |           |           |           |
|----|-----------|-----------|-----------|
| C  | -0.462342 | 2.299818  | -0.213787 |
| N  | 0.071971  | 1.067509  | -0.197961 |
| C  | 1.422464  | 0.908813  | -0.069588 |
| C  | 2.263002  | 2.012488  | 0.051096  |
| C  | 1.710822  | 3.297136  | 0.038370  |
| C  | 0.328761  | 3.438437  | -0.097557 |
| Pt | -0.968328 | -0.670950 | -0.408571 |
| N  | 0.850750  | -1.410440 | -0.234577 |
| C  | 1.107734  | -2.738714 | -0.224585 |
| C  | 2.393499  | -3.226551 | -0.069217 |
| C  | 3.451002  | -2.307939 | 0.083174  |
| C  | 3.175678  | -0.928511 | 0.084087  |
| C  | 1.863756  | -0.496295 | -0.073024 |
| C  | 4.812755  | -2.785959 | 0.243137  |
| O  | 5.763124  | -1.926521 | 0.381166  |
| C  | 7.169686  | -2.320403 | 0.548457  |
| C  | 2.542595  | 4.549108  | 0.161894  |
| O  | 3.844485  | 4.273163  | 0.284350  |
| C  | 4.717143  | 5.428706  | 0.408027  |
| O  | -3.523161 | -1.839005 | 1.168877  |
| C  | -4.371026 | -0.888846 | 0.810656  |
| C  | -3.983985 | 0.112020  | -0.173178 |
| C  | -4.876198 | 1.050836  | -0.744132 |
| C  | -6.201825 | 1.370269  | -0.472316 |
| C  | -7.051129 | 0.858780  | 0.510956  |
| C  | -6.745350 | -0.150204 | 1.420458  |
| C  | -5.581814 | -0.910535 | 1.523842  |
| O  | -2.750938 | 0.229323  | -0.615694 |
| O  | 4.999851  | -4.073449 | 0.237163  |
| O  | 2.047445  | 5.652233  | 0.147498  |
| H  | 0.234920  | -3.372703 | -0.346874 |
| H  | 2.563406  | -4.296623 | -0.069380 |
| H  | 3.975431  | -0.209495 | 0.209596  |
| H  | 3.335325  | 1.898550  | 0.151332  |
| H  | -0.112603 | 4.429023  | -0.111862 |
| H  | -1.539083 | 2.342179  | -0.327198 |
| H  | -5.592298 | -1.697310 | 2.274199  |
| H  | -7.529022 | -0.414688 | 2.125754  |
| H  | -8.046118 | 1.290458  | 0.571110  |
| H  | -6.619759 | 2.151901  | -1.102003 |
| H  | -4.403356 | 1.634296  | -1.530411 |
| H  | 7.502755  | -2.864917 | -0.339106 |
| H  | 7.277857  | -2.899109 | 1.469634  |
| H  | 4.444936  | 6.004424  | 1.294606  |
| H  | 4.627337  | 6.056421  | -0.480513 |
| H  | 5.722202  | 5.020572  | 0.499232  |
| H  | 7.706173  | -1.378175 | 0.632767  |
| O  | -1.810097 | -2.481830 | -0.582222 |
| H  | -2.220465 | -2.563194 | -1.461660 |
| H  | -2.860664 | -2.136043 | 0.442791  |
| H  | 5.926493  | -4.366982 | 0.344587  |

Step 2 – Same side

Reactants

|    |           |           |           |
|----|-----------|-----------|-----------|
| C  | 0.575550  | 2.159608  | 0.327798  |
| N  | -0.035370 | 0.965243  | 0.266494  |
| C  | -1.383688 | 0.900484  | 0.046548  |
| C  | -2.136902 | 2.054535  | -0.144551 |
| C  | -1.500884 | 3.300140  | -0.102528 |
| C  | -0.130035 | 3.347521  | 0.145047  |
| Pt | 0.865481  | -0.848007 | 0.533237  |

# Electronic Supplementary Information for Dalton Transactions

This journal is © The Royal Society of Chemistry 2008

|   |           |           |           |
|---|-----------|-----------|-----------|
| N | -1.006040 | -1.445786 | 0.320456  |
| C | -1.361594 | -2.749516 | 0.349247  |
| C | -2.669399 | -3.147942 | 0.127351  |
| C | -3.637446 | -2.160050 | -0.137034 |
| C | -3.258709 | -0.807081 | -0.175253 |
| C | -1.929223 | -0.466436 | 0.056276  |
| C | -5.021005 | -2.541421 | -0.374046 |
| O | -5.887149 | -1.620399 | -0.616088 |
| C | -7.307244 | -1.910023 | -0.868352 |
| C | -2.234507 | 4.602237  | -0.300060 |
| O | -3.540781 | 4.411709  | -0.515041 |
| C | -4.320862 | 5.620899  | -0.714076 |
| O | 3.274939  | -2.266735 | -1.083999 |
| C | 4.078728  | -1.222721 | -1.007838 |
| C | 3.830074  | -0.160794 | -0.045873 |
| C | 4.691624  | 0.933726  | 0.179039  |
| C | 5.881041  | 1.331226  | -0.429773 |
| C | 6.562072  | 0.757178  | -1.501112 |
| C | 6.194201  | -0.399087 | -2.189038 |
| C | 5.118906  | -1.250273 | -1.956518 |
| O | 2.769455  | -0.187755 | 0.744359  |
| O | -5.308262 | -3.808306 | -0.327429 |
| O | -1.670556 | 5.671139  | -0.261519 |
| H | -0.548118 | -3.439952 | 0.550873  |
| H | -2.921872 | -4.201021 | 0.161394  |
| H | -3.990230 | -0.036958 | -0.384730 |
| H | -3.204869 | 2.011516  | -0.319027 |
| H | 0.376621  | 4.304802  | 0.198902  |
| H | 1.630273  | 2.149148  | 0.566843  |
| H | 5.058840  | -2.128058 | -2.595129 |
| H | 6.846598  | -0.698737 | -3.005325 |
| H | 7.467376  | 1.258014  | -1.832211 |
| H | 6.320442  | 2.235797  | -0.016207 |
| H | 4.334852  | 1.581352  | 0.977442  |
| H | -7.744278 | -2.380421 | 0.016416  |
| H | -7.397761 | -2.524581 | -1.767899 |
| H | -3.946889 | 6.163684  | -1.584217 |
| H | -4.253095 | 6.255215  | 0.171785  |
| H | -5.342437 | 5.280463  | -0.874321 |
| H | -7.756347 | -0.933583 | -1.034396 |
| O | 1.570177  | -2.712014 | 0.748308  |
| H | 2.004578  | -2.782542 | 1.617192  |
| H | 2.651429  | -2.449902 | -0.290192 |
| H | 2.802120  | 1.015058  | 2.486262  |
| O | 2.611095  | 1.957615  | 2.622659  |
| H | 2.844721  | 2.151325  | 3.544023  |
| H | -6.245166 | -4.037584 | -0.490131 |

## Transition state

|    |           |           |           |
|----|-----------|-----------|-----------|
| C  | -0.181307 | 2.446084  | -0.894537 |
| N  | 0.190329  | 1.165414  | -0.718871 |
| C  | 1.428979  | 0.874541  | -0.221380 |
| C  | 2.315994  | 1.892235  | 0.124604  |
| C  | 1.929751  | 3.223694  | -0.046779 |
| C  | 0.663583  | 3.500299  | -0.568541 |
| Pt | -0.945922 | -0.463744 | -1.156436 |
| N  | 0.676132  | -1.372985 | -0.556969 |
| C  | 0.802034  | -2.725852 | -0.525425 |
| C  | 1.953531  | -3.333217 | -0.069131 |
| C  | 3.024437  | -2.527447 | 0.378211  |
| C  | 2.883369  | -1.126650 | 0.351601  |
| C  | 1.705070  | -0.564824 | -0.117639 |

# Electronic Supplementary Information for Dalton Transactions

This journal is © The Royal Society of Chemistry 2008

|   |           |           |           |
|---|-----------|-----------|-----------|
| C | 4.247243  | -3.134242 | 0.847744  |
| O | 5.213394  | -2.372721 | 1.246792  |
| C | 6.489938  | -2.910035 | 1.728659  |
| C | 2.820408  | 4.388931  | 0.303280  |
| O | 4.003503  | 3.988393  | 0.778688  |
| C | 4.923230  | 5.053844  | 1.139481  |
| O | -3.357706 | -2.114912 | 0.717919  |
| C | -3.952631 | -1.044047 | 1.216612  |
| C | -3.797321 | 0.229079  | 0.520200  |
| C | -4.380529 | 1.446688  | 0.946612  |
| C | -5.200988 | 1.759277  | 2.025232  |
| C | -5.681655 | 0.932351  | 3.043690  |
| C | -5.436808 | -0.430534 | 3.193450  |
| C | -4.681255 | -1.283908 | 2.389655  |
| O | -3.112777 | 0.236083  | -0.582358 |
| O | 4.315872  | -4.436847 | 0.842338  |
| O | 2.464795  | 5.535542  | 0.156130  |
| H | -0.065102 | -3.271216 | -0.883781 |
| H | 2.017803  | -4.414817 | -0.064953 |
| H | 3.690918  | -0.488787 | 0.688703  |
| H | 3.299738  | 1.672216  | 0.520451  |
| H | 0.353565  | 4.529399  | -0.713357 |
| H | -1.168996 | 2.600989  | -1.310422 |
| H | -4.648476 | -2.326703 | 2.695315  |
| H | -5.905372 | -0.907352 | 4.050789  |
| H | -6.314541 | 1.400005  | 3.792503  |
| H | -5.507597 | 2.801285  | 2.079263  |
| H | -4.141905 | 2.271685  | 0.279337  |
| H | 6.978642  | -3.469232 | 0.926074  |
| H | 6.319220  | -3.514766 | 2.623552  |
| H | 4.479575  | 5.677896  | 1.917498  |
| H | 5.146063  | 5.663182  | 0.261587  |
| H | 5.817007  | 4.550167  | 1.503525  |
| H | 7.077773  | -2.030341 | 1.980600  |
| O | -1.882828 | -2.205812 | -1.438582 |
| H | -2.379097 | -2.210343 | -2.274291 |
| H | -2.900928 | -2.003378 | -0.175843 |
| H | -2.972336 | 0.745883  | -2.329912 |
| O | -2.100887 | 0.726331  | -2.787143 |
| H | -2.214906 | 0.316431  | -3.661589 |
| H | 5.158276  | -4.813266 | 1.163981  |

## Products

|    |           |           |           |
|----|-----------|-----------|-----------|
| C  | 0.598452  | 2.706333  | -0.437693 |
| N  | 0.755578  | 1.370690  | -0.434045 |
| C  | 1.961966  | 0.831244  | -0.082415 |
| C  | 3.039305  | 1.644136  | 0.262024  |
| C  | 2.880835  | 3.033002  | 0.248171  |
| C  | 1.639974  | 3.566720  | -0.105561 |
| Pt | -0.685058 | -0.002372 | -0.875527 |
| N  | 0.798092  | -1.233096 | -0.432022 |
| C  | 0.670292  | -2.575569 | -0.485545 |
| C  | 1.739855  | -3.412219 | -0.206547 |
| C  | 2.976287  | -2.830462 | 0.130215  |
| C  | 3.099403  | -1.432105 | 0.186529  |
| C  | 1.988773  | -0.641203 | -0.098138 |
| C  | 4.125858  | -3.679386 | 0.414422  |
| O  | 5.245775  | -3.126531 | 0.720865  |
| C  | 6.461967  | -3.901119 | 1.018543  |
| C  | 3.989200  | 3.990010  | 0.605430  |
| O  | 5.117609  | 3.349583  | 0.928508  |
| C  | 6.236458  | 4.204680  | 1.287265  |

# Electronic Supplementary Information for Dalton Transactions

This journal is © The Royal Society of Chemistry 2008

|   |           |           |           |
|---|-----------|-----------|-----------|
| O | -3.790275 | -1.582945 | 0.950408  |
| C | -4.895487 | -0.843229 | 1.015691  |
| C | -5.107595 | 0.113179  | -0.064363 |
| C | -6.207334 | 0.995954  | -0.150446 |
| C | -7.305577 | 1.174978  | 0.682723  |
| C | -7.640038 | 0.515697  | 1.870726  |
| C | -6.917177 | -0.491362 | 2.501948  |
| C | -5.709657 | -1.083681 | 2.122770  |
| O | -4.212149 | 0.103208  | -1.000172 |
| O | 3.950865  | -4.964124 | 0.339681  |
| O | 3.832674  | 5.188934  | 0.588742  |
| H | -0.318846 | -2.928106 | -0.766344 |
| H | 1.607156  | -4.486365 | -0.255725 |
| H | 4.045392  | -0.972842 | 0.444009  |
| H | 3.997155  | 1.224835  | 0.544434  |
| H | 1.498845  | 4.642141  | -0.114652 |
| H | -0.388422 | 3.066170  | -0.705220 |
| H | -5.325305 | -1.860194 | 2.779446  |
| H | -7.346404 | -0.879523 | 3.422344  |
| H | -8.564918 | 0.823396  | 2.350265  |
| H | -8.009068 | 1.936774  | 0.354843  |
| H | -6.171058 | 1.622144  | -1.038696 |
| H | 6.746379  | -4.480695 | 0.136437  |
| H | 6.288424  | -4.522041 | 1.901298  |
| H | 5.974692  | 4.810982  | 2.156442  |
| H | 6.488983  | 4.855059  | 0.447751  |
| H | 7.055292  | 3.524826  | 1.516232  |
| H | 7.215984  | -3.147069 | 1.231916  |
| O | -1.922472 | -1.524240 | -1.152287 |
| H | -2.638833 | -1.284156 | -1.766799 |
| H | -3.264673 | -1.409123 | 0.124302  |
| H | -3.141774 | 0.906950  | -1.150206 |
| O | -2.163518 | 1.357800  | -1.348974 |
| H | -2.149629 | 1.564868  | -2.301767 |
| H | 4.736843  | -5.513267 | 0.534606  |

## Step2 – Opposite side

### Reactants

|    |           |           |           |
|----|-----------|-----------|-----------|
| C  | -0.243224 | 2.411679  | 0.236146  |
| N  | 0.222227  | 1.153787  | 0.168661  |
| C  | 1.565216  | 0.927788  | 0.063742  |
| C  | 2.468593  | 1.987029  | 0.022068  |
| C  | 1.987381  | 3.298075  | 0.089369  |
| C  | 0.611769  | 3.509035  | 0.199054  |
| Pt | -0.915628 | -0.541899 | 0.250112  |
| N  | 0.864902  | -1.361304 | 0.080610  |
| C  | 1.053335  | -2.698801 | -0.001231 |
| C  | 2.315177  | -3.242037 | -0.159257 |
| C  | 3.428711  | -2.380981 | -0.238201 |
| C  | 3.219698  | -0.991847 | -0.157638 |
| C  | 1.929686  | -0.497314 | -0.002986 |
| C  | 4.783449  | -2.890894 | -0.403985 |
| O  | 5.757848  | -2.059830 | -0.389732 |
| C  | 7.155585  | -2.514482 | -0.564926 |
| C  | 2.889956  | 4.505607  | 0.049934  |
| O  | 4.176738  | 4.162561  | -0.060957 |
| C  | 5.115805  | 5.270629  | -0.108325 |
| O  | -3.520874 | -1.570168 | -1.356167 |
| C  | -4.306961 | -0.574788 | -1.014833 |
| C  | -3.879797 | 0.402576  | -0.018602 |
| C  | -4.720873 | 1.396377  | 0.532303  |

# Electronic Supplementary Information for Dalton Transactions

This journal is © The Royal Society of Chemistry 2008

|   |           |           |           |
|---|-----------|-----------|-----------|
| C | -6.020114 | 1.800287  | 0.237707  |
| C | -6.882326 | 1.342651  | -0.757812 |
| C | -6.622969 | 0.314414  | -1.663106 |
| C | -5.508806 | -0.514605 | -1.749286 |
| O | -2.651383 | 0.440912  | 0.451786  |
| O | 5.087988  | -4.147005 | -0.567432 |
| O | 2.456943  | 5.632998  | 0.113193  |
| H | 0.143670  | -3.288748 | 0.066902  |
| H | 2.389789  | -4.324716 | -0.201727 |
| H | 4.059858  | -0.312505 | -0.224355 |
| H | 3.535320  | 1.818693  | -0.059462 |
| H | 0.225137  | 4.520878  | 0.253629  |
| H | -1.318900 | 2.508506  | 0.324268  |
| H | -5.553553 | -1.295470 | -2.504477 |
| H | -7.409021 | 0.100751  | -2.383008 |
| H | -7.846951 | 1.835843  | -0.836488 |
| H | -6.396401 | 2.609467  | 0.858892  |
| H | -4.226029 | 1.952959  | 1.324699  |
| H | 7.246715  | -2.998269 | -1.537738 |
| H | 7.404496  | -3.198120 | 0.246995  |
| H | 5.043408  | 5.855976  | 0.810220  |
| H | 4.894744  | 5.905715  | -0.968171 |
| H | 6.097761  | 4.810428  | -0.203150 |
| H | 7.736638  | -1.597642 | -0.513022 |
| O | -1.837198 | -2.311021 | 0.292191  |
| H | -2.221426 | -2.454193 | 1.192668  |
| H | -2.838897 | -1.915344 | -0.626578 |
| H | -3.086419 | -2.188227 | 3.496086  |
| O | -2.842273 | -2.830826 | 2.812543  |
| H | -3.451647 | -3.577040 | 2.926368  |
| H | 4.322709  | -4.751554 | -0.600362 |

## Transition state

|    |           |           |           |
|----|-----------|-----------|-----------|
| C  | 0.051754  | 2.419870  | -0.611492 |
| N  | -0.325294 | 1.131559  | -0.540402 |
| C  | -1.614028 | 0.814351  | -0.217946 |
| C  | -2.565292 | 1.811832  | -0.012328 |
| C  | -2.184345 | 3.151793  | -0.119513 |
| C  | -0.852469 | 3.456495  | -0.410662 |
| Pt | 0.890946  | -0.474151 | -0.839667 |
| N  | -0.730377 | -1.406784 | -0.284491 |
| C  | -0.792146 | -2.751974 | -0.098936 |
| C  | -1.967316 | -3.380394 | 0.255773  |
| C  | -3.138412 | -2.612624 | 0.442673  |
| C  | -3.054711 | -1.215588 | 0.284399  |
| C  | -1.848877 | -0.627835 | -0.068949 |
| C  | -4.409026 | -3.217328 | 0.796501  |
| O  | -5.417413 | -2.452449 | 1.008482  |
| C  | -6.740148 | -3.012878 | 1.358088  |
| C  | -3.144461 | 4.297840  | 0.082597  |
| O  | -4.381273 | 3.870507  | 0.349326  |
| C  | -5.372475 | 4.914292  | 0.553419  |
| O  | 4.267991  | -0.990321 | -0.998861 |
| C  | 4.703746  | -0.412829 | 0.155207  |
| C  | 3.756650  | 0.471136  | 0.826292  |
| C  | 4.043219  | 1.135500  | 2.064588  |
| C  | 5.188739  | 1.191290  | 2.829927  |
| C  | 6.449065  | 0.592748  | 2.615478  |
| C  | 6.811991  | -0.223698 | 1.563828  |
| C  | 6.021742  | -0.671679 | 0.484901  |
| O  | 2.619768  | 0.707969  | 0.284816  |
| O  | -4.615069 | -4.500024 | 0.918060  |

# Electronic Supplementary Information for Dalton Transactions

This journal is © The Royal Society of Chemistry 2008

|   |           |           |           |
|---|-----------|-----------|-----------|
| O | -2.789973 | 5.451327  | 0.002604  |
| H | 0.144488  | -3.276469 | -0.255067 |
| H | -1.932731 | -4.458357 | 0.384689  |
| H | -3.932877 | -0.600978 | 0.436926  |
| H | -3.591488 | 1.570386  | 0.235754  |
| H | -0.539018 | 4.492756  | -0.476051 |
| H | 1.101512  | 2.598304  | -0.810630 |
| H | 6.515111  | -1.333560 | -0.222621 |
| H | 7.835467  | -0.589380 | 1.564538  |
| H | 7.211938  | 0.802445  | 3.360074  |
| H | 5.110816  | 1.798268  | 3.729179  |
| H | 3.193467  | 1.710956  | 2.423542  |
| H | -6.650343 | -3.568094 | 2.292069  |
| H | -7.076272 | -3.654502 | 0.543128  |
| H | -5.450894 | 5.529316  | -0.344921 |
| H | -5.083716 | 5.536705  | 1.402402  |
| H | -6.305056 | 4.388924  | 0.751291  |
| H | -7.374251 | -2.137338 | 1.469508  |
| O | 1.959377  | -2.166418 | -1.002933 |
| H | 1.940365  | -2.446179 | -1.936937 |
| H | 3.417279  | -1.539459 | -0.869229 |
| H | 3.209982  | 0.043192  | -2.055034 |
| O | 2.311614  | 0.223999  | -2.439956 |
| H | 2.290358  | 1.161588  | -2.695967 |
| H | -3.837585 | -5.056790 | 0.726264  |

## Products

|    |           |           |           |
|----|-----------|-----------|-----------|
| C  | -0.615003 | 2.619964  | -0.492505 |
| N  | -0.784142 | 1.289690  | -0.418788 |
| C  | -2.007075 | 0.764327  | -0.114397 |
| C  | -3.100051 | 1.593643  | 0.123171  |
| C  | -2.932593 | 2.980610  | 0.047969  |
| C  | -1.672974 | 3.495985  | -0.262161 |
| Pt | 0.678679  | -0.069830 | -0.751736 |
| N  | -0.828619 | -1.309280 | -0.351360 |
| C  | -0.714070 | -2.655463 | -0.325817 |
| C  | -1.793512 | -3.474771 | -0.044652 |
| C  | -3.043015 | -2.884228 | 0.230213  |
| C  | -3.149742 | -1.482143 | 0.222967  |
| C  | -2.031331 | -0.708319 | -0.070409 |
| C  | -4.222061 | -3.688338 | 0.530800  |
| O  | -5.287680 | -3.093614 | 0.914880  |
| C  | -6.524693 | -3.850380 | 1.216533  |
| C  | -4.058552 | 3.954031  | 0.288951  |
| O  | -5.206858 | 3.328936  | 0.569933  |
| C  | -6.344767 | 4.198272  | 0.814581  |
| O  | 4.465875  | -0.577097 | -1.138841 |
| C  | 5.318733  | -0.267523 | -0.164720 |
| C  | 4.820833  | 0.402635  | 1.013388  |
| C  | 5.550655  | 0.653566  | 2.188585  |
| C  | 6.897707  | 0.470348  | 2.483982  |
| C  | 7.927379  | 0.011480  | 1.658441  |
| C  | 7.809497  | -0.425178 | 0.341080  |
| C  | 6.660342  | -0.562665 | -0.438879 |
| O  | 3.557772  | 0.794911  | 1.054085  |
| O  | -4.275054 | -4.986176 | 0.438124  |
| O  | -3.898981 | 5.150942  | 0.225628  |
| H  | 0.283465  | -3.034466 | -0.524224 |
| H  | -1.618917 | -4.546541 | -0.020980 |
| H  | -4.099335 | -1.009243 | 0.438518  |
| H  | -4.076386 | 1.191586  | 0.364297  |
| H  | -1.529753 | 4.569489  | -0.321265 |



Electronic Supplementary Information for Dalton Transactions

This journal is © The Royal Society of Chemistry 2008

|   |           |           |           |
|---|-----------|-----------|-----------|
| H | 0.389625  | 2.947097  | -0.739347 |
| H | 6.798400  | -0.992512 | -1.427839 |
| H | 8.731090  | -0.739311 | -0.142237 |
| H | 8.924476  | -0.004102 | 2.089405  |
| H | 7.190293  | 0.764965  | 3.488668  |
| H | 4.940646  | 1.099219  | 2.970346  |
| H | -6.324288 | -4.526242 | 2.048136  |
| H | -6.829233 | -4.394211 | 0.322046  |
| H | -6.541271 | 4.808178  | -0.069178 |
| H | -6.139058 | 4.845189  | 1.669470  |
| H | -7.178035 | 3.528935  | 1.021502  |
| H | -7.241933 | -3.079956 | 1.486547  |
| O | 2.070401  | -1.505409 | -1.005398 |
| H | 2.086975  | -1.753505 | -1.947595 |
| H | 3.526140  | -0.894391 | -0.875068 |
| H | 2.609682  | 1.097210  | -1.825566 |
| O | 2.095780  | 1.298154  | -1.023265 |
| H | 3.086197  | 0.949501  | 0.158478  |
| H | -3.460707 | -5.403285 | 0.098420  |
